# Supplementary material
Source: PubMed Central journal article supplement (PMC1383546)

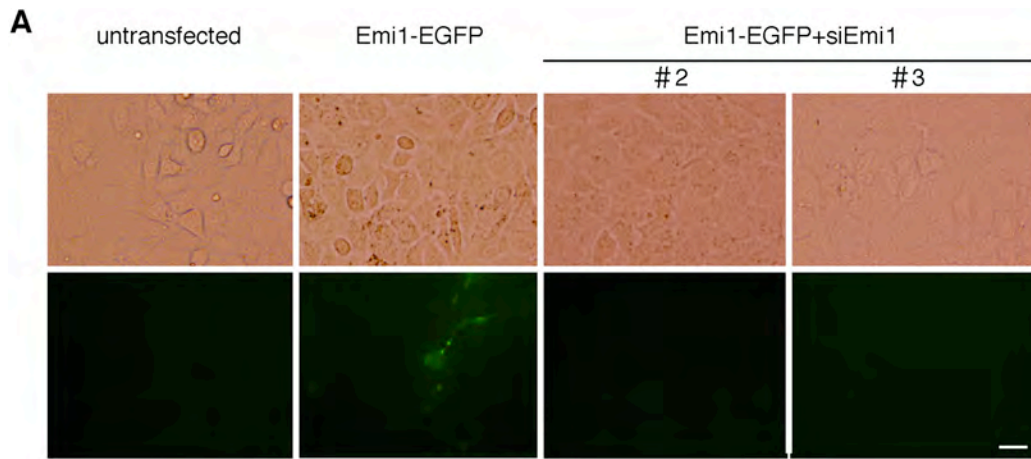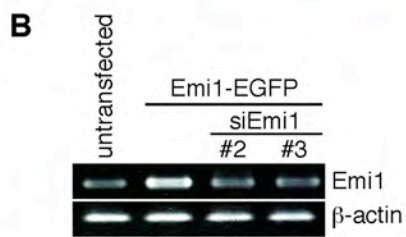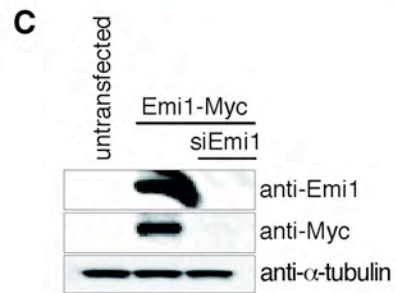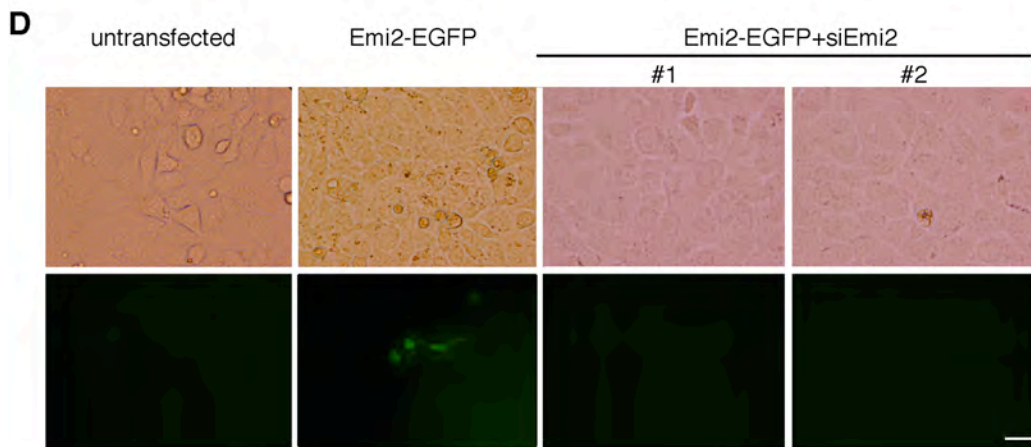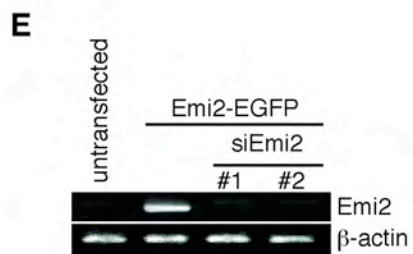

Supplementary Figure 1  
Shoji *et al*

Supplement: 7600953s3.pdf [file 7600953s3.pdf]

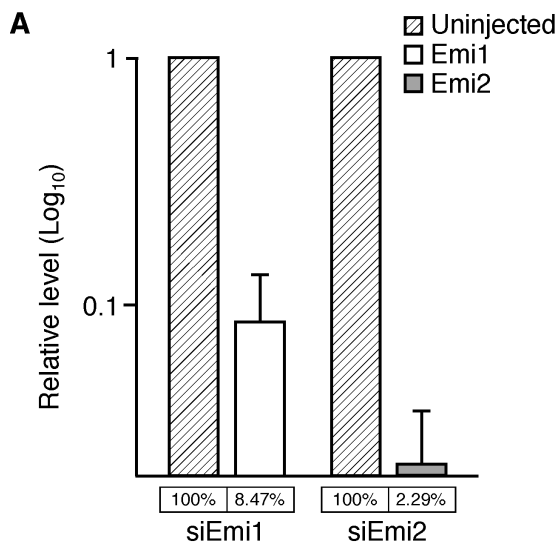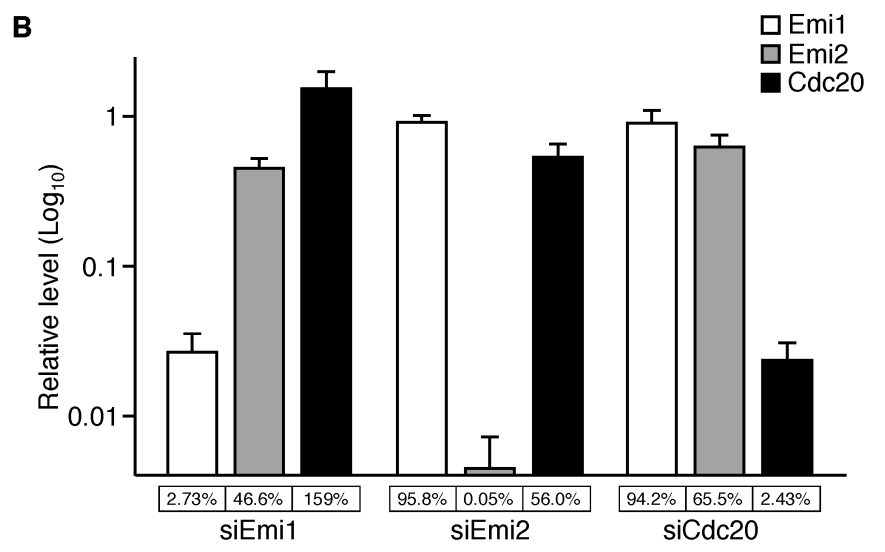

**Supplementary Figure 2**  
Shoji *et al*

Supplement: 7600953s4.pdf [file 7600953s4.pdf]
